# Supplementary material for: Central Role of the Holliday Junction Helicase RuvAB in vlsE Recombination and Infectivity of Borrelia burgdorferi
Source: PubMed Central journal article supplement (PMC2780311; doi:10.1371/journal.ppat.1000679), 2009-12-04

**A**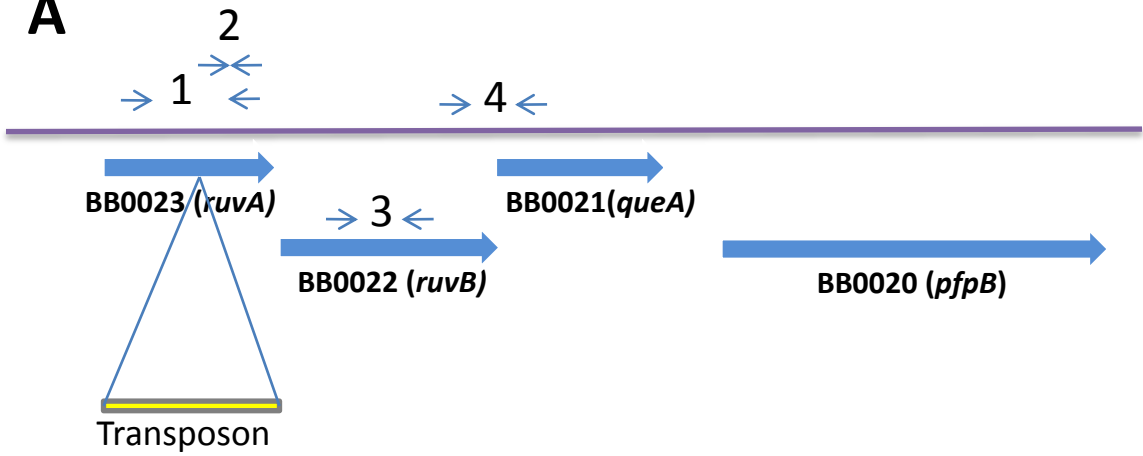**B**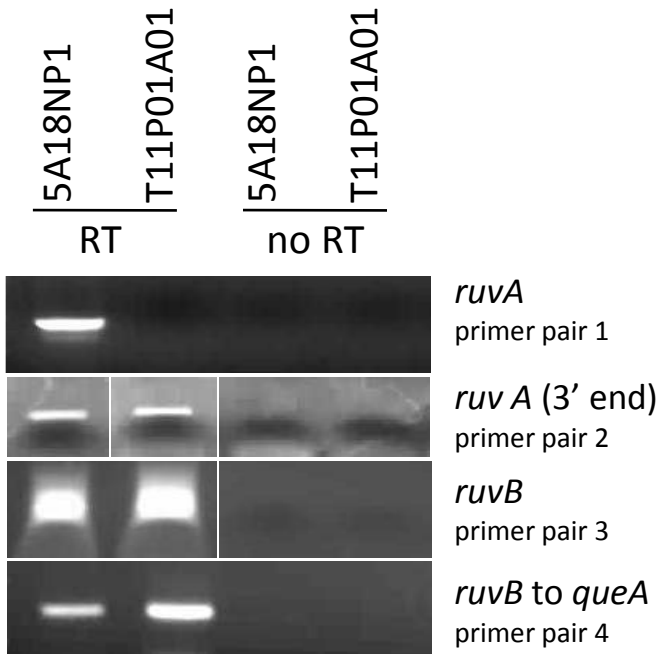

Supplement: ppat.1000679.s001.pdf [file ppat.1000679.s001.pdf]
