# Supplementary material for: Central Role of the Holliday Junction Helicase RuvAB in vlsE Recombination and Infectivity of Borrelia burgdorferi
Source: PubMed Central journal article supplement (PMC2780311; doi:10.1371/journal.ppat.1000679), 2009-12-04
Supplement: ppat.1000679.s003.pdf [file ppat.1000679.s003.pdf]

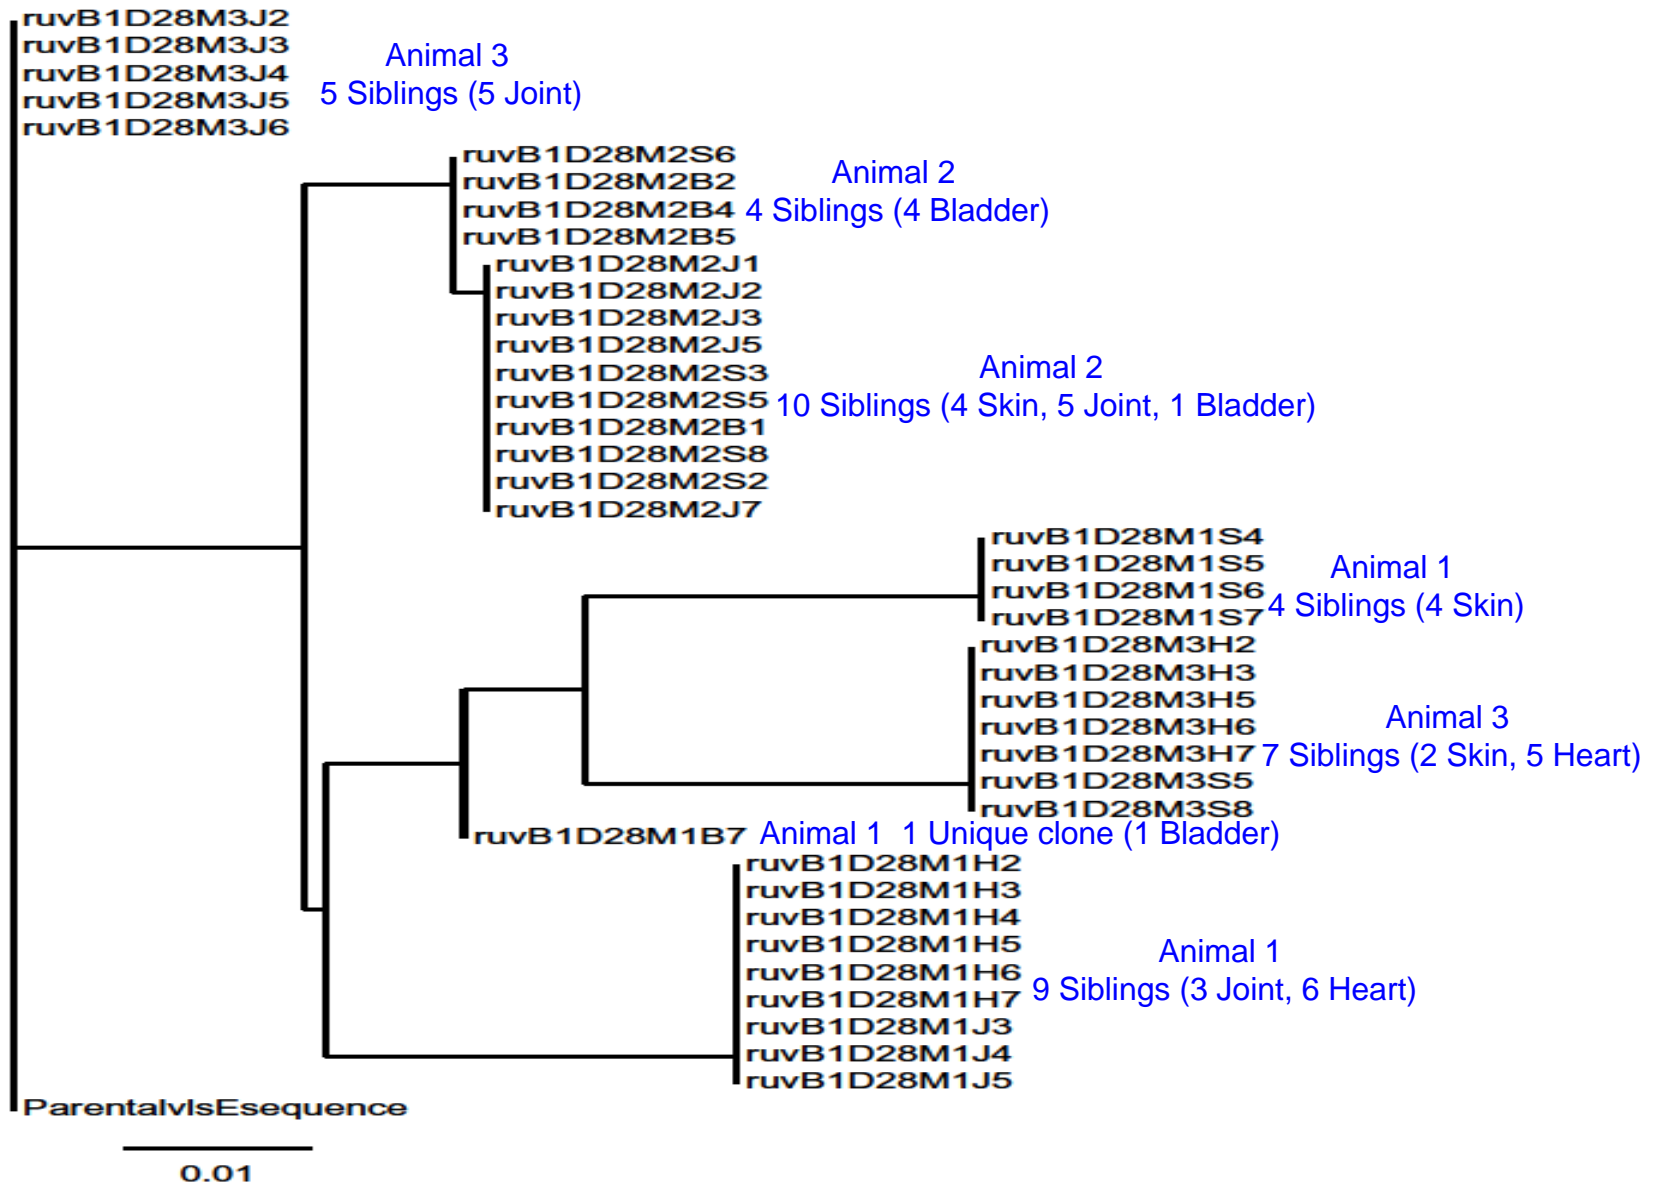

T03TC051. 3 mice shown. One unique sequence, 6 sequences with siblings, and 5 parental sequences
