# Supplementary material for: Central Role of the Holliday Junction Helicase RuvAB in vlsE Recombination and Infectivity of Borrelia burgdorferi
Source: PubMed Central journal article supplement (PMC2780311; doi:10.1371/journal.ppat.1000679), 2009-12-04
Supplement: ppat.1000679.s004.pdf [file ppat.1000679.s004.pdf]

**Table S1. The *B. burgdorferi* *ruvA* mutant T11P01A01 and the *ruvB* mutant T03TC051 exhibit decreased *vlsE* sequence variation during infection of C3H/HeN and C3H/SCID mice.**

| <i>B. burgdorferi</i> strain | Day post inoculation | Mouse strain | Total no. of clones sequenced | No. of clones with parental sequence (%) | No. of variants with unique sequence (%) | No. of variants with non-unique sequence (%) | No. of mice tested | No. of tissues tested |
|------------------------------|----------------------|--------------|-------------------------------|------------------------------------------|------------------------------------------|----------------------------------------------|--------------------|-----------------------|
| <i>ruvA</i> mutant           | 7                    | C3H/HeN      | 99                            | 99 (100)                                 | 0 (0)                                    | 0 (0)                                        | 5                  | 5 <sup>a</sup>        |
| <i>ruvB</i> mutant           | 7                    | C3H/HeN      | 22                            | 22 (100)                                 | 0 (0)                                    | 0 (0)                                        | 4                  | 4 <sup>a</sup>        |
| 5A18NP1                      | 7                    | C3H/HeN      | 65                            | 7 (11)                                   | 38 (58)                                  | 20 (31)                                      | 5                  | 5 <sup>a</sup>        |
| <i>ruvA</i> mutant           | 14                   | C3H/HeN      | 16                            | 16 (100)                                 | 0 (0)                                    | 0 (0)                                        | 3                  | 3 <sup>b</sup>        |
| 5A18NP1                      | 14                   | C3H/HeN      | 59                            | 0 (0)                                    | 48 (81)                                  | 11 (19)                                      | 1                  | 3 <sup>c</sup>        |
| <i>ruvA</i> mutant           | 28                   | C3H/HeN      | 114                           | 3 (3)                                    | 0 (0)                                    | 111 (97)                                     | 6                  | 12 <sup>c</sup>       |
| <i>ruvB</i> mutant           | 28                   | C3H/HeN      | 40                            | 5 (12.5)                                 | 1 (2.5)                                  | 34 (85)                                      | 3                  | 10 <sup>d</sup>       |
| 5A18NP1                      | 28                   | C3H/HeN      | 63                            | 0 (0)                                    | 31 (49)                                  | 32 (51)                                      | 1                  | 4 <sup>d</sup>        |
| <i>ruvA</i> mutant           | 14                   | C3H/SCID     | 85                            | 85 (100)                                 | 0 (0)                                    | 0 (0)                                        | 5                  | 20 <sup>d</sup>       |
| 5A18NP1                      | 14                   | C3H/SCID     | 76                            | 19 (25)                                  | 51 (67)                                  | 6 (8)                                        | 5                  | 17 <sup>d</sup>       |
| <i>ruvA</i> mutant           | 28                   | C3H/SCID     | 68                            | 68 (100)                                 | 0 (0)                                    | 0 (0)                                        | 5                  | 18 <sup>d</sup>       |
| 5A18NP1                      | 28                   | C3H/SCID     | 47                            | 0 (0)                                    | 41 (87)                                  | 6 (13)                                       | 5                  | 16 <sup>d</sup>       |

<sup>a</sup> skin isolates only

<sup>b</sup> joint isolates only

<sup>c</sup> skin, joint, bladder isolates

<sup>d</sup> skin, joint, heart, and bladder isolates
