# Supplementary material for: Central Role of the Holliday Junction Helicase RuvAB in vlsE Recombination and Infectivity of Borrelia burgdorferi
Source: PubMed Central journal article supplement (PMC2780311; doi:10.1371/journal.ppat.1000679), 2009-12-04
Supplement: ppat.1000679.s005.pdf [file ppat.1000679.s005.pdf]

| <b>Table S2. Primers used in RT-PCR of the <i>ruvAB</i> locus.</b> |                                                      |                                   |
|--------------------------------------------------------------------|------------------------------------------------------|-----------------------------------|
| <b>Primer name</b>                                                 | <b>cDNA target</b>                                   | <b>Sequence</b>                   |
| Primer pair 1-forward (5753)                                       | ruvA coding sequence                                 | 5'-ACTTTTAGTTAGTGCATTTTGCCTTGC-3' |
| Primer pair 1-reverse (5756)                                       |                                                      | 5'-TAAAAACTGCTCCTTTTCAGAATC-3'    |
| Primer pair 2-forward (5755)                                       | ruvA coding sequence 3' of transposon insertion site | 5'-GCGAGCTTGAATCCACTGGTC-3'       |
| Primer pair 2-reverse (5756)                                       |                                                      | 5'-TAAAAACTGCTCCTTTTCAGAATC-3'    |
| Primer pair 3-forward (5757)                                       | ruvB coding sequence                                 | 5'-GAGAGAGATGAGGCTCTAGATCATG-3'   |
| Primer pair 3-reverse (5758)                                       |                                                      | 5'-GAAATAGCTAAAGTATCAACACCTAC-3'  |
| Primer pair 4-forward (5781)                                       | ruvB to queA coding sequence                         | 5'-GTAGGTGTTGATACTTTAGCTATTTC-3'  |
| Primer pair 4-reverse (5782)                                       |                                                      | 5'-GCACGATTAACCTTGAAGATCCTC-3'    |
