# Supplementary material for: Central Role of the Holliday Junction Helicase RuvAB in vlsE Recombination and Infectivity of Borrelia burgdorferi
Source: PubMed Central journal article supplement (PMC2780311; doi:10.1371/journal.ppat.1000679), 2009-12-04
Supplement: ppat.1000679.s006.pdf [file ppat.1000679.s006.pdf]

Table S3. *B. burgdorferi* isolates generated in this study.

Parental = identical to *vlsE* cassette region sequence of 5A18NP1 (parental strain)

| Clone Name                                      | GenBank No. | Infecting Clone | Mouse Strain | Days Post Infection | Tissue |
|-------------------------------------------------|-------------|-----------------|--------------|---------------------|--------|
| <i>vlsE</i> cassette region sequence of 5A18NP1 | GQ369288    | --              | --           | --                  | --     |
| 5A18NP1D7M1S02                                  | GQ506180    | 5A18NP1         | C3H/HeN      | D7                  | Skin   |
| 5A18NP1D7M1S06                                  | GQ506181    | 5A18NP1         | C3H/HeN      | D7                  | Skin   |
| 5A18NP1D7M1S08                                  | GQ506182    | 5A18NP1         | C3H/HeN      | D7                  | Skin   |
| 5A18NP1D7M1S11                                  | GQ506183    | 5A18NP1         | C3H/HeN      | D7                  | Skin   |
| 5A18NP1D7M1S12                                  | GQ506184    | 5A18NP1         | C3H/HeN      | D7                  | Skin   |
| 5A18NP1D7M1S13                                  | GQ506185    | 5A18NP1         | C3H/HeN      | D7                  | Skin   |
| 5A18NP1D7M1S14                                  | GQ506186    | 5A18NP1         | C3H/HeN      | D7                  | Skin   |
| 5A18NP1D7M1S15                                  | GQ506187    | 5A18NP1         | C3H/HeN      | D7                  | Skin   |
| 5A18NP1D7M1S16                                  | GQ506188    | 5A18NP1         | C3H/HeN      | D7                  | Skin   |
| 5A18NP1D7M1S18                                  | GQ506189    | 5A18NP1         | C3H/HeN      | D7                  | Skin   |
| 5A18NP1D7M1S19                                  | GQ506190    | 5A18NP1         | C3H/HeN      | D7                  | Skin   |
| 5A18NP1D7M1S20                                  | GQ506191    | 5A18NP1         | C3H/HeN      | D7                  | Skin   |
| 5A18NP1D7M1S23                                  | GQ506192    | 5A18NP1         | C3H/HeN      | D7                  | Skin   |
| 5A18NP1D7M1S24                                  | GQ506193    | 5A18NP1         | C3H/HeN      | D7                  | Skin   |
| 5A18NP1D7M2S06                                  | GQ506155    | 5A18NP1         | C3H/HeN      | D7                  | Skin   |
| 5A18NP1D7M2S11                                  | GQ506156    | 5A18NP1         | C3H/HeN      | D7                  | Skin   |
| 5A18NP1D7M2S12                                  | GQ506157    | 5A18NP1         | C3H/HeN      | D7                  | Skin   |
| 5A18NP1D7M2S14                                  | GQ506158    | 5A18NP1         | C3H/HeN      | D7                  | Skin   |
| 5A18NP1D7M2S17                                  | Parental    | 5A18NP1         | C3H/HeN      | D7                  | Skin   |
| 5A18NP1D7M2S18                                  | GQ506160    | 5A18NP1         | C3H/HeN      | D7                  | Skin   |
| 5A18NP1D7M2S20                                  | GQ506161    | 5A18NP1         | C3H/HeN      | D7                  | Skin   |
| 5A18NP1D7M2S23                                  | GQ506162    | 5A18NP1         | C3H/HeN      | D7                  | Skin   |
| 5A18NP1D7M2S24                                  | GQ506163    | 5A18NP1         | C3H/HeN      | D7                  | Skin   |
| 5A18NP1D7M3S01                                  | GQ506141    | 5A18NP1         | C3H/HeN      | D7                  | Skin   |
| 5A18NP1D7M3S02                                  | GQ506142    | 5A18NP1         | C3H/HeN      | D7                  | Skin   |
| 5A18NP1D7M3S03                                  | GQ506143    | 5A18NP1         | C3H/HeN      | D7                  | Skin   |
| 5A18NP1D7M3S04                                  | GQ506144    | 5A18NP1         | C3H/HeN      | D7                  | Skin   |
| 5A18NP1D7M3S05                                  | GQ506145    | 5A18NP1         | C3H/HeN      | D7                  | Skin   |
| 5A18NP1D7M3S06                                  | Parental    | 5A18NP1         | C3H/HeN      | D7                  | Skin   |
| 5A18NP1D7M3S07                                  | GQ506147    | 5A18NP1         | C3H/HeN      | D7                  | Skin   |
| 5A18NP1D7M3S11                                  | GQ506148    | 5A18NP1         | C3H/HeN      | D7                  | Skin   |
| 5A18NP1D7M3S14                                  | GQ506149    | 5A18NP1         | C3H/HeN      | D7                  | Skin   |
| 5A18NP1D7M3S15                                  | Parental    | 5A18NP1         | C3H/HeN      | D7                  | Skin   |
| 5A18NP1D7M3S17                                  | GQ506151    | 5A18NP1         | C3H/HeN      | D7                  | Skin   |
| 5A18NP1D7M3S18                                  | GQ506152    | 5A18NP1         | C3H/HeN      | D7                  | Skin   |
| 5A18NP1D7M3S20                                  | Parental    | 5A18NP1         | C3H/HeN      | D7                  | Skin   |
| 5A18NP1D7M3S22                                  | GQ506154    | 5A18NP1         | C3H/HeN      | D7                  | Skin   |
| 5A18NP1D7M4S01                                  | GQ506164    | 5A18NP1         | C3H/HeN      | D7                  | Skin   |
| 5A18NP1D7M4S03                                  | GQ506165    | 5A18NP1         | C3H/HeN      | D7                  | Skin   |
| 5A18NP1D7M4S04                                  | GQ506166    | 5A18NP1         | C3H/HeN      | D7                  | Skin   |

|                 |          |         |         |     |         |
|-----------------|----------|---------|---------|-----|---------|
| 5A18NP1D7M4S05  | GQ506167 | 5A18NP1 | C3H/HeN | D7  | Skin    |
| 5A18NP1D7M4S08  | GQ506168 | 5A18NP1 | C3H/HeN | D7  | Skin    |
| 5A18NP1D7M4S09  | GQ506169 | 5A18NP1 | C3H/HeN | D7  | Skin    |
| 5A18NP1D7M4S10  | GQ506170 | 5A18NP1 | C3H/HeN | D7  | Skin    |
| 5A18NP1D7M4S11  | Parental | 5A18NP1 | C3H/HeN | D7  | Skin    |
| 5A18NP1D7M4S12  | Parental | 5A18NP1 | C3H/HeN | D7  | Skin    |
| 5A18NP1D7M4S13  | GQ506173 | 5A18NP1 | C3H/HeN | D7  | Skin    |
| 5A18NP1D7M4S16  | GQ506174 | 5A18NP1 | C3H/HeN | D7  | Skin    |
| 5A18NP1D7M4S18  | GQ506175 | 5A18NP1 | C3H/HeN | D7  | Skin    |
| 5A18NP1D7M4S20  | GQ506176 | 5A18NP1 | C3H/HeN | D7  | Skin    |
| 5A18NP1D7M4S21  | GQ506177 | 5A18NP1 | C3H/HeN | D7  | Skin    |
| 5A18NP1D7M4S23  | GQ506178 | 5A18NP1 | C3H/HeN | D7  | Skin    |
| 5A18NP1D7M4S24  | GQ506179 | 5A18NP1 | C3H/HeN | D7  | Skin    |
| 5A18NP1D7M5S01  | GQ506194 | 5A18NP1 | C3H/HeN | D7  | Skin    |
| 5A18NP1D7M5S02  | GQ506195 | 5A18NP1 | C3H/HeN | D7  | Skin    |
| 5A18NP1D7M5S03  | GQ506196 | 5A18NP1 | C3H/HeN | D7  | Skin    |
| 5A18NP1D7M5S04  | GQ506197 | 5A18NP1 | C3H/HeN | D7  | Skin    |
| 5A18NP1D7M5S05  | GQ506198 | 5A18NP1 | C3H/HeN | D7  | Skin    |
| 5A18NP1D7M5S06  | GQ506199 | 5A18NP1 | C3H/HeN | D7  | Skin    |
| 5A18NP1D7M5S08  | Parental | 5A18NP1 | C3H/HeN | D7  | Skin    |
| 5A18NP1D7M5S09  | GQ506201 | 5A18NP1 | C3H/HeN | D7  | Skin    |
| 5A18NP1D7M5S10  | GQ506202 | 5A18NP1 | C3H/HeN | D7  | Skin    |
| 5A18NP1D7M5S11  | GQ506203 | 5A18NP1 | C3H/HeN | D7  | Skin    |
| 5A18NP1D7M5S12  | GQ506204 | 5A18NP1 | C3H/HeN | D7  | Skin    |
| 5A18NP1D7M5S13  | GQ506205 | 5A18NP1 | C3H/HeN | D7  | Skin    |
| 5A18NP1D14M1B01 | GQ506215 | 5A18NP1 | C3H/HeN | D14 | Bladder |
| 5A18NP1D14M1B03 | GQ506221 | 5A18NP1 | C3H/HeN | D14 | Bladder |
| 5A18NP1D14M1B04 | GQ506222 | 5A18NP1 | C3H/HeN | D14 | Bladder |
| 5A18NP1D14M1B05 | GQ506223 | 5A18NP1 | C3H/HeN | D14 | Bladder |
| 5A18NP1D14M1B06 | GQ506224 | 5A18NP1 | C3H/HeN | D14 | Bladder |
| 5A18NP1D14M1B07 | GQ506225 | 5A18NP1 | C3H/HeN | D14 | Bladder |
| 5A18NP1D14M1B08 | GQ506226 | 5A18NP1 | C3H/HeN | D14 | Bladder |
| 5A18NP1D14M1B09 | GQ506227 | 5A18NP1 | C3H/HeN | D14 | Bladder |
| 5A18NP1D14M1B10 | GQ506206 | 5A18NP1 | C3H/HeN | D14 | Bladder |
| 5A18NP1D14M1B11 | GQ506207 | 5A18NP1 | C3H/HeN | D14 | Bladder |
| 5A18NP1D14M1B12 | GQ506208 | 5A18NP1 | C3H/HeN | D14 | Bladder |
| 5A18NP1D14M1B13 | GQ506209 | 5A18NP1 | C3H/HeN | D14 | Bladder |
| 5A18NP1D14M1B15 | GQ506210 | 5A18NP1 | C3H/HeN | D14 | Bladder |
| 5A18NP1D14M1B16 | GQ506211 | 5A18NP1 | C3H/HeN | D14 | Bladder |
| 5A18NP1D14M1B17 | GQ506212 | 5A18NP1 | C3H/HeN | D14 | Bladder |
| 5A18NP1D14M1B18 | GQ506213 | 5A18NP1 | C3H/HeN | D14 | Bladder |
| 5A18NP1D14M1B19 | GQ506214 | 5A18NP1 | C3H/HeN | D14 | Bladder |
| 5A18NP1D14M1B20 | GQ506216 | 5A18NP1 | C3H/HeN | D14 | Bladder |
| 5A18NP1D14M1B21 | GQ506217 | 5A18NP1 | C3H/HeN | D14 | Bladder |
| 5A18NP1D14M1B22 | GQ506218 | 5A18NP1 | C3H/HeN | D14 | Bladder |
| 5A18NP1D14M1B23 | GQ506219 | 5A18NP1 | C3H/HeN | D14 | Bladder |
| 5A18NP1D14M1B24 | GQ506220 | 5A18NP1 | C3H/HeN | D14 | Bladder |

|                 |          |         |         |     |         |
|-----------------|----------|---------|---------|-----|---------|
| 5A18NP1D14M1J02 | GQ506240 | 5A18NP1 | C3H/HeN | D14 | Joint   |
| 5A18NP1D14M1J03 | GQ506241 | 5A18NP1 | C3H/HeN | D14 | Joint   |
| 5A18NP1D14M1J04 | GQ506242 | 5A18NP1 | C3H/HeN | D14 | Joint   |
| 5A18NP1D14M1J06 | GQ506243 | 5A18NP1 | C3H/HeN | D14 | Joint   |
| 5A18NP1D14M1J07 | GQ506244 | 5A18NP1 | C3H/HeN | D14 | Joint   |
| 5A18NP1D14M1J08 | GQ506245 | 5A18NP1 | C3H/HeN | D14 | Joint   |
| 5A18NP1D14M1J09 | GQ506246 | 5A18NP1 | C3H/HeN | D14 | Joint   |
| 5A18NP1D14M1J11 | GQ506228 | 5A18NP1 | C3H/HeN | D14 | Joint   |
| 5A18NP1D14M1J12 | GQ506229 | 5A18NP1 | C3H/HeN | D14 | Joint   |
| 5A18NP1D14M1J13 | GQ506230 | 5A18NP1 | C3H/HeN | D14 | Joint   |
| 5A18NP1D14M1J14 | GQ506231 | 5A18NP1 | C3H/HeN | D14 | Joint   |
| 5A18NP1D14M1J15 | GQ506232 | 5A18NP1 | C3H/HeN | D14 | Joint   |
| 5A18NP1D14M1J16 | GQ506233 | 5A18NP1 | C3H/HeN | D14 | Joint   |
| 5A18NP1D14M1J17 | GQ506234 | 5A18NP1 | C3H/HeN | D14 | Joint   |
| 5A18NP1D14M1J19 | GQ506235 | 5A18NP1 | C3H/HeN | D14 | Joint   |
| 5A18NP1D14M1J20 | GQ506236 | 5A18NP1 | C3H/HeN | D14 | Joint   |
| 5A18NP1D14M1J22 | GQ506237 | 5A18NP1 | C3H/HeN | D14 | Joint   |
| 5A18NP1D14M1J23 | GQ506238 | 5A18NP1 | C3H/HeN | D14 | Joint   |
| 5A18NP1D14M1J24 | GQ506239 | 5A18NP1 | C3H/HeN | D14 | Joint   |
| 5A18NP1D14M1S01 | GQ506254 | 5A18NP1 | C3H/HeN | D14 | Skin    |
| 5A18NP1D14M1S02 | GQ506259 | 5A18NP1 | C3H/HeN | D14 | Skin    |
| 5A18NP1D14M1S03 | GQ506260 | 5A18NP1 | C3H/HeN | D14 | Skin    |
| 5A18NP1D14M1S04 | GQ506261 | 5A18NP1 | C3H/HeN | D14 | Skin    |
| 5A18NP1D14M1S05 | GQ506262 | 5A18NP1 | C3H/HeN | D14 | Skin    |
| 5A18NP1D14M1S08 | GQ506263 | 5A18NP1 | C3H/HeN | D14 | Skin    |
| 5A18NP1D14M1S09 | GQ506264 | 5A18NP1 | C3H/HeN | D14 | Skin    |
| 5A18NP1D14M1S10 | GQ506247 | 5A18NP1 | C3H/HeN | D14 | Skin    |
| 5A18NP1D14M1S12 | GQ506248 | 5A18NP1 | C3H/HeN | D14 | Skin    |
| 5A18NP1D14M1S14 | GQ506249 | 5A18NP1 | C3H/HeN | D14 | Skin    |
| 5A18NP1D14M1S15 | GQ506250 | 5A18NP1 | C3H/HeN | D14 | Skin    |
| 5A18NP1D14M1S16 | GQ506251 | 5A18NP1 | C3H/HeN | D14 | Skin    |
| 5A18NP1D14M1S17 | GQ506252 | 5A18NP1 | C3H/HeN | D14 | Skin    |
| 5A18NP1D14M1S18 | GQ506253 | 5A18NP1 | C3H/HeN | D14 | Skin    |
| 5A18NP1D14M1S20 | GQ506255 | 5A18NP1 | C3H/HeN | D14 | Skin    |
| 5A18NP1D14M1S21 | GQ506256 | 5A18NP1 | C3H/HeN | D14 | Skin    |
| 5A18NP1D14M1S22 | GQ506257 | 5A18NP1 | C3H/HeN | D14 | Skin    |
| 5A18NP1D14M1S24 | GQ506258 | 5A18NP1 | C3H/HeN | D14 | Skin    |
| 5A18NP1D28M1B01 | GQ506265 | 5A18NP1 | C3H/HeN | D28 | Bladder |
| 5A18NP1D28M1B02 | GQ506266 | 5A18NP1 | C3H/HeN | D28 | Bladder |
| 5A18NP1D28M1B03 | GQ506267 | 5A18NP1 | C3H/HeN | D28 | Bladder |
| 5A18NP1D28M1B04 | GQ506268 | 5A18NP1 | C3H/HeN | D28 | Bladder |
| 5A18NP1D28M1B06 | GQ506269 | 5A18NP1 | C3H/HeN | D28 | Bladder |
| 5A18NP1D28M1B08 | GQ506270 | 5A18NP1 | C3H/HeN | D28 | Bladder |
| 5A18NP1D28M1B10 | GQ506271 | 5A18NP1 | C3H/HeN | D28 | Bladder |
| 5A18NP1D28M1B12 | GQ506272 | 5A18NP1 | C3H/HeN | D28 | Bladder |
| 5A18NP1D28M1B13 | GQ506273 | 5A18NP1 | C3H/HeN | D28 | Bladder |
| 5A18NP1D28M1B14 | GQ506274 | 5A18NP1 | C3H/HeN | D28 | Bladder |

|                 |          |         |         |     |         |
|-----------------|----------|---------|---------|-----|---------|
| 5A18NP1D28M1B15 | GQ506275 | 5A18NP1 | C3H/HeN | D28 | Bladder |
| 5A18NP1D28M1B16 | GQ506276 | 5A18NP1 | C3H/HeN | D28 | Bladder |
| 5A18NP1D28M1B18 | GQ506277 | 5A18NP1 | C3H/HeN | D28 | Bladder |
| 5A18NP1D28M1B19 | GQ506278 | 5A18NP1 | C3H/HeN | D28 | Bladder |
| 5A18NP1D28M1B20 | GQ506279 | 5A18NP1 | C3H/HeN | D28 | Bladder |
| 5A18NP1D28M1B21 | GQ506280 | 5A18NP1 | C3H/HeN | D28 | Bladder |
| 5A18NP1D28M1B22 | GQ506281 | 5A18NP1 | C3H/HeN | D28 | Bladder |
| 5A18NP1D28M1B24 | GQ506282 | 5A18NP1 | C3H/HeN | D28 | Bladder |
| 5A18NP1D28M1H02 | GQ506283 | 5A18NP1 | C3H/HeN | D28 | Heart   |
| 5A18NP1D28M1H03 | GQ506284 | 5A18NP1 | C3H/HeN | D28 | Heart   |
| 5A18NP1D28M1H05 | GQ506285 | 5A18NP1 | C3H/HeN | D28 | Heart   |
| 5A18NP1D28M1H06 | GQ506286 | 5A18NP1 | C3H/HeN | D28 | Heart   |
| 5A18NP1D28M1H07 | GQ506287 | 5A18NP1 | C3H/HeN | D28 | Heart   |
| 5A18NP1D28M1H08 | GQ506288 | 5A18NP1 | C3H/HeN | D28 | Heart   |
| 5A18NP1D28M1H09 | GQ506289 | 5A18NP1 | C3H/HeN | D28 | Heart   |
| 5A18NP1D28M1H10 | GQ506290 | 5A18NP1 | C3H/HeN | D28 | Heart   |
| 5A18NP1D28M1H11 | GU067769 | 5A18NP1 | C3H/HeN | D28 | Heart   |
| 5A18NP1D28M1H12 | GQ506291 | 5A18NP1 | C3H/HeN | D28 | Heart   |
| 5A18NP1D28M1H13 | GQ506292 | 5A18NP1 | C3H/HeN | D28 | Heart   |
| 5A18NP1D28M1H14 | GQ506293 | 5A18NP1 | C3H/HeN | D28 | Heart   |
| 5A18NP1D28M1H15 | GQ506294 | 5A18NP1 | C3H/HeN | D28 | Heart   |
| 5A18NP1D28M1H16 | GQ506295 | 5A18NP1 | C3H/HeN | D28 | Heart   |
| 5A18NP1D28M1H18 | GQ506296 | 5A18NP1 | C3H/HeN | D28 | Heart   |
| 5A18NP1D28M1H19 | GQ506297 | 5A18NP1 | C3H/HeN | D28 | Heart   |
| 5A18NP1D28M1H20 | GQ506298 | 5A18NP1 | C3H/HeN | D28 | Heart   |
| 5A18NP1D28M1H21 | GQ506299 | 5A18NP1 | C3H/HeN | D28 | Heart   |
| 5A18NP1D28M1H22 | GQ506300 | 5A18NP1 | C3H/HeN | D28 | Heart   |
| 5A18NP1D28M1H24 | GQ506301 | 5A18NP1 | C3H/HeN | D28 | Heart   |
| 5A18NP1D28M1J04 | GQ506302 | 5A18NP1 | C3H/HeN | D28 | Joint   |
| 5A18NP1D28M1J05 | GQ506303 | 5A18NP1 | C3H/HeN | D28 | Joint   |
| 5A18NP1D28M1J06 | GQ506304 | 5A18NP1 | C3H/HeN | D28 | Joint   |
| 5A18NP1D28M1J07 | GQ506305 | 5A18NP1 | C3H/HeN | D28 | Joint   |
| 5A18NP1D28M1J09 | GQ506306 | 5A18NP1 | C3H/HeN | D28 | Joint   |
| 5A18NP1D28M1J10 | GQ506307 | 5A18NP1 | C3H/HeN | D28 | Joint   |
| 5A18NP1D28M1J13 | GQ506308 | 5A18NP1 | C3H/HeN | D28 | Joint   |
| 5A18NP1D28M1J14 | GQ506309 | 5A18NP1 | C3H/HeN | D28 | Joint   |
| 5A18NP1D28M1J15 | GQ506310 | 5A18NP1 | C3H/HeN | D28 | Joint   |
| 5A18NP1D28M1J16 | GQ506311 | 5A18NP1 | C3H/HeN | D28 | Joint   |
| 5A18NP1D28M1J19 | GQ506312 | 5A18NP1 | C3H/HeN | D28 | Joint   |
| 5A18NP1D28M1J20 | GQ506313 | 5A18NP1 | C3H/HeN | D28 | Joint   |
| 5A18NP1D28M1J21 | GQ506314 | 5A18NP1 | C3H/HeN | D28 | Joint   |
| 5A18NP1D28M1J22 | GQ506315 | 5A18NP1 | C3H/HeN | D28 | Joint   |
| 5A18NP1D28M1J25 | GQ506316 | 5A18NP1 | C3H/HeN | D28 | Joint   |
| 5A18NP1D28M1S02 | GQ506317 | 5A18NP1 | C3H/HeN | D28 | Skin    |
| 5A18NP1D28M1S05 | GU067770 | 5A18NP1 | C3H/HeN | D28 | Skin    |
| 5A18NP1D28M1S08 | GQ506318 | 5A18NP1 | C3H/HeN | D28 | Skin    |
| 5A18NP1D28M1S10 | GQ506319 | 5A18NP1 | C3H/HeN | D28 | Skin    |

|                 |          |         |          |     |         |
|-----------------|----------|---------|----------|-----|---------|
| 5A18NP1D28M1S15 | GQ506320 | 5A18NP1 | C3H/HeN  | D28 | Skin    |
| 5A18NP1D28M1S16 | GQ506321 | 5A18NP1 | C3H/HeN  | D28 | Skin    |
| 5A18NP1D28M1S18 | GQ506322 | 5A18NP1 | C3H/HeN  | D28 | Skin    |
| 5A18NP1D28M1S19 | GQ506323 | 5A18NP1 | C3H/HeN  | D28 | Skin    |
| 5A18NP1D28M1S21 | GQ506324 | 5A18NP1 | C3H/HeN  | D28 | Skin    |
| 5A18NP1D28M1S23 | GQ506325 | 5A18NP1 | C3H/HeN  | D28 | Skin    |
| 5A18NP1SD14M1B1 | Parental | 5A18NP1 | C3H/scid | D14 | Bladder |
| 5A18NP1SD14M1B2 | Parental | 5A18NP1 | C3H/scid | D14 | Bladder |
| 5A18NP1SD14M1B3 | GQ506346 | 5A18NP1 | C3H/scid | D14 | Bladder |
| 5A18NP1SD14M1B4 | Parental | 5A18NP1 | C3H/scid | D14 | Bladder |
| 5A18NP1SD14M1B5 | Parental | 5A18NP1 | C3H/scid | D14 | Bladder |
| 5A18NP1SD14M1B6 | GQ506349 | 5A18NP1 | C3H/scid | D14 | Bladder |
| 5A18NP1SD14M1J1 | Parental | 5A18NP1 | C3H/scid | D14 | Joint   |
| 5A18NP1SD14M1J3 | GQ506351 | 5A18NP1 | C3H/scid | D14 | Joint   |
| 5A18NP1SD14M1S2 | Parental | 5A18NP1 | C3H/scid | D14 | Skin    |
| 5A18NP1SD14M1S3 | GQ506353 | 5A18NP1 | C3H/scid | D14 | Skin    |
| 5A18NP1SD14M1S4 | Parental | 5A18NP1 | C3H/scid | D14 | Skin    |
| 5A18NP1SD14M1S5 | GQ506355 | 5A18NP1 | C3H/scid | D14 | Skin    |
| 5A18NP1SD14M1S6 | GQ506356 | 5A18NP1 | C3H/scid | D14 | Skin    |
| 5A18NP1SD14M2B1 | GQ506369 | 5A18NP1 | C3H/scid | D14 | Bladder |
| 5A18NP1SD14M2B3 | GQ506370 | 5A18NP1 | C3H/scid | D14 | Bladder |
| 5A18NP1SD14M2B4 | GQ506371 | 5A18NP1 | C3H/scid | D14 | Bladder |
| 5A18NP1SD14M2B5 | Parental | 5A18NP1 | C3H/scid | D14 | Bladder |
| 5A18NP1SD14M2B6 | GQ506373 | 5A18NP1 | C3H/scid | D14 | Bladder |
| 5A18NP1SD14M2H1 | GQ506374 | 5A18NP1 | C3H/scid | D14 | Heart   |
| 5A18NP1SD14M2H2 | GQ506375 | 5A18NP1 | C3H/scid | D14 | Heart   |
| 5A18NP1SD14M2H3 | GQ506376 | 5A18NP1 | C3H/scid | D14 | Heart   |
| 5A18NP1SD14M2H4 | GQ506377 | 5A18NP1 | C3H/scid | D14 | Heart   |
| 5A18NP1SD14M2H5 | GQ506378 | 5A18NP1 | C3H/scid | D14 | Heart   |
| 5A18NP1SD14M2J1 | GQ506379 | 5A18NP1 | C3H/scid | D14 | Joint   |
| 5A18NP1SD14M2J2 | GQ506380 | 5A18NP1 | C3H/scid | D14 | Joint   |
| 5A18NP1SD14M2J3 | GQ506381 | 5A18NP1 | C3H/scid | D14 | Joint   |
| 5A18NP1SD14M2J4 | Parental | 5A18NP1 | C3H/scid | D14 | Joint   |
| 5A18NP1SD14M2J5 | GQ506383 | 5A18NP1 | C3H/scid | D14 | Joint   |
| 5A18NP1SD14M2J6 | Parental | 5A18NP1 | C3H/scid | D14 | Joint   |
| 5A18NP1SD14M2S1 | GQ506385 | 5A18NP1 | C3H/scid | D14 | Skin    |
| 5A18NP1SD14M2S2 | Parental | 5A18NP1 | C3H/scid | D14 | Skin    |
| 5A18NP1SD14M2S3 | GQ506387 | 5A18NP1 | C3H/scid | D14 | Skin    |
| 5A18NP1SD14M2S4 | Parental | 5A18NP1 | C3H/scid | D14 | Skin    |
| 5A18NP1SD14M2S5 | GQ506389 | 5A18NP1 | C3H/scid | D14 | Skin    |
| 5A18NP1SD14M2S6 | Parental | 5A18NP1 | C3H/scid | D14 | Skin    |
| 5A18NP1SD14M3B1 | GQ506326 | 5A18NP1 | C3H/scid | D14 | Bladder |
| 5A18NP1SD14M3B3 | GQ506327 | 5A18NP1 | C3H/scid | D14 | Bladder |
| 5A18NP1SD14M3B4 | GQ506328 | 5A18NP1 | C3H/scid | D14 | Bladder |
| 5A18NP1SD14M3B5 | GQ506329 | 5A18NP1 | C3H/scid | D14 | Bladder |
| 5A18NP1SD14M3B6 | GQ506330 | 5A18NP1 | C3H/scid | D14 | Bladder |
| 5A18NP1SD14M3H1 | GQ506331 | 5A18NP1 | C3H/scid | D14 | Heart   |

|                 |          |         |          |     |         |
|-----------------|----------|---------|----------|-----|---------|
| 5A18NP1SD14M3H2 | GQ506332 | 5A18NP1 | C3H/scid | D14 | Heart   |
| 5A18NP1SD14M3H3 | GQ506333 | 5A18NP1 | C3H/scid | D14 | Heart   |
| 5A18NP1SD14M3H4 | GQ506334 | 5A18NP1 | C3H/scid | D14 | Heart   |
| 5A18NP1SD14M3H5 | GQ506335 | 5A18NP1 | C3H/scid | D14 | Heart   |
| 5A18NP1SD14M3H6 | GQ506336 | 5A18NP1 | C3H/scid | D14 | Heart   |
| 5A18NP1SD14M3J1 | GQ506337 | 5A18NP1 | C3H/scid | D14 | Joint   |
| 5A18NP1SD14M3J2 | Parental | 5A18NP1 | C3H/scid | D14 | Joint   |
| 5A18NP1SD14M3J3 | GQ506339 | 5A18NP1 | C3H/scid | D14 | Joint   |
| 5A18NP1SD14M3J5 | GQ506340 | 5A18NP1 | C3H/scid | D14 | Joint   |
| 5A18NP1SD14M3J6 | GQ506341 | 5A18NP1 | C3H/scid | D14 | Joint   |
| 5A18NP1SD14M3S2 | GQ506342 | 5A18NP1 | C3H/scid | D14 | Skin    |
| 5A18NP1SD14M3S5 | Parental | 5A18NP1 | C3H/scid | D14 | Skin    |
| 5A18NP1SD14M4B1 | GQ506357 | 5A18NP1 | C3H/scid | D14 | Bladder |
| 5A18NP1SD14M4B4 | GQ506358 | 5A18NP1 | C3H/scid | D14 | Bladder |
| 5A18NP1SD14M4B5 | GQ506359 | 5A18NP1 | C3H/scid | D14 | Bladder |
| 5A18NP1SD14M4B6 | GQ506360 | 5A18NP1 | C3H/scid | D14 | Bladder |
| 5A18NP1SD14M4J1 | GQ506361 | 5A18NP1 | C3H/scid | D14 | Joint   |
| 5A18NP1SD14M4J2 | Parental | 5A18NP1 | C3H/scid | D14 | Joint   |
| 5A18NP1SD14M4J3 | GQ506363 | 5A18NP1 | C3H/scid | D14 | Joint   |
| 5A18NP1SD14M4J5 | GQ506364 | 5A18NP1 | C3H/scid | D14 | Joint   |
| 5A18NP1SD14M4S1 | GQ506365 | 5A18NP1 | C3H/scid | D14 | Skin    |
| 5A18NP1SD14M4S2 | GQ506366 | 5A18NP1 | C3H/scid | D14 | Skin    |
| 5A18NP1SD14M4S3 | GQ506367 | 5A18NP1 | C3H/scid | D14 | Skin    |
| 5A18NP1SD14M4S6 | Parental | 5A18NP1 | C3H/scid | D14 | Skin    |
| 5A18NP1SD14M5H1 | GQ506398 | 5A18NP1 | C3H/scid | D14 | Heart   |
| 5A18NP1SD14M5H2 | GQ506399 | 5A18NP1 | C3H/scid | D14 | Heart   |
| 5A18NP1SD14M5H5 | GQ506400 | 5A18NP1 | C3H/scid | D14 | Heart   |
| 5A18NP1SD14M5H6 | GQ506401 | 5A18NP1 | C3H/scid | D14 | Heart   |
| 5A18NP1SD14M5J1 | Parental | 5A18NP1 | C3H/scid | D14 | Joint   |
| 5A18NP1SD14M5J3 | GQ506392 | 5A18NP1 | C3H/scid | D14 | Joint   |
| 5A18NP1SD14M5J4 | GQ506393 | 5A18NP1 | C3H/scid | D14 | Joint   |
| 5A18NP1SD14M5S2 | Parental | 5A18NP1 | C3H/scid | D14 | Skin    |
| 5A18NP1SD14M5S3 | GQ506395 | 5A18NP1 | C3H/scid | D14 | Skin    |
| 5A18NP1SD14M5S4 | GQ506396 | 5A18NP1 | C3H/scid | D14 | Skin    |
| 5A18NP1SD14M5S5 | GQ506397 | 5A18NP1 | C3H/scid | D14 | Skin    |
| 5A18NP1SD28M1B1 | GQ506407 | 5A18NP1 | C3H/scid | D28 | Bladder |
| 5A18NP1SD28M1B4 | GQ506408 | 5A18NP1 | C3H/scid | D28 | Bladder |
| 5A18NP1SD28M1B6 | GQ506409 | 5A18NP1 | C3H/scid | D28 | Bladder |
| 5A18NP1SD28M1H1 | GQ506410 | 5A18NP1 | C3H/scid | D28 | Heart   |
| 5A18NP1SD28M1H2 | GQ506411 | 5A18NP1 | C3H/scid | D28 | Heart   |
| 5A18NP1SD28M1H4 | GQ506412 | 5A18NP1 | C3H/scid | D28 | Heart   |
| 5A18NP1SD28M1J1 | GQ506413 | 5A18NP1 | C3H/scid | D28 | Joint   |
| 5A18NP1SD28M1J2 | GQ506414 | 5A18NP1 | C3H/scid | D28 | Joint   |
| 5A18NP1SD28M1J6 | GQ506415 | 5A18NP1 | C3H/scid | D28 | Joint   |
| 5A18NP1SD28M1S3 | GQ506416 | 5A18NP1 | C3H/scid | D28 | Skin    |
| 5A18NP1SD28M1S6 | GQ506417 | 5A18NP1 | C3H/scid | D28 | Skin    |
| 5A18NP1SD28M2B2 | GQ506427 | 5A18NP1 | C3H/scid | D28 | Bladder |

|                 |          |           |          |     |         |
|-----------------|----------|-----------|----------|-----|---------|
| 5A18NP1SD28M2H3 | GQ506428 | 5A18NP1   | C3H/scid | D28 | Heart   |
| 5A18NP1SD28M2J1 | GQ506429 | 5A18NP1   | C3H/scid | D28 | Joint   |
| 5A18NP1SD28M2J2 | GQ506430 | 5A18NP1   | C3H/scid | D28 | Joint   |
| 5A18NP1SD28M2J3 | GQ506431 | 5A18NP1   | C3H/scid | D28 | Joint   |
| 5A18NP1SD28M2J4 | GQ506432 | 5A18NP1   | C3H/scid | D28 | Joint   |
| 5A18NP1SD28M2J5 | GQ506433 | 5A18NP1   | C3H/scid | D28 | Joint   |
| 5A18NP1SD28M2J6 | GQ506434 | 5A18NP1   | C3H/scid | D28 | Joint   |
| 5A18NP1SD28M2S1 | GQ506435 | 5A18NP1   | C3H/scid | D28 | Skin    |
| 5A18NP1SD28M2S2 | GQ506436 | 5A18NP1   | C3H/scid | D28 | Skin    |
| 5A18NP1SD28M2S3 | GQ506437 | 5A18NP1   | C3H/scid | D28 | Skin    |
| 5A18NP1SD28M2S4 | GQ506438 | 5A18NP1   | C3H/scid | D28 | Skin    |
| 5A18NP1SD28M2S5 | GQ506439 | 5A18NP1   | C3H/scid | D28 | Skin    |
| 5A18NP1SD28M2S6 | GQ506440 | 5A18NP1   | C3H/scid | D28 | Skin    |
| 5A18NP1SD28M3J2 | GQ506406 | 5A18NP1   | C3H/scid | D28 | Joint   |
| 5A18NP1SD28M3S2 | GQ506402 | 5A18NP1   | C3H/scid | D28 | Skin    |
| 5A18NP1SD28M3S3 | GQ506403 | 5A18NP1   | C3H/scid | D28 | Skin    |
| 5A18NP1SD28M3S4 | GQ506404 | 5A18NP1   | C3H/scid | D28 | Skin    |
| 5A18NP1SD28M3S6 | GQ506405 | 5A18NP1   | C3H/scid | D28 | Skin    |
| 5A18NP1SD28M4B1 | GQ506418 | 5A18NP1   | C3H/scid | D28 | Bladder |
| 5A18NP1SD28M4B3 | GQ506419 | 5A18NP1   | C3H/scid | D28 | Bladder |
| 5A18NP1SD28M4B4 | GQ506420 | 5A18NP1   | C3H/scid | D28 | Bladder |
| 5A18NP1SD28M4J1 | GQ506421 | 5A18NP1   | C3H/scid | D28 | Joint   |
| 5A18NP1SD28M4J4 | GQ506422 | 5A18NP1   | C3H/scid | D28 | Joint   |
| 5A18NP1SD28M4J6 | GQ506423 | 5A18NP1   | C3H/scid | D28 | Joint   |
| 5A18NP1SD28M4S2 | GQ506424 | 5A18NP1   | C3H/scid | D28 | Skin    |
| 5A18NP1SD28M4S4 | GQ506425 | 5A18NP1   | C3H/scid | D28 | Skin    |
| 5A18NP1SD28M4S5 | GQ506426 | 5A18NP1   | C3H/scid | D28 | Skin    |
| 5A18NP1SD28M5B1 | GQ506441 | 5A18NP1   | C3H/scid | D28 | Bladder |
| 5A18NP1SD28M5B3 | GQ506442 | 5A18NP1   | C3H/scid | D28 | Bladder |
| 5A18NP1SD28M5B8 | GQ506443 | 5A18NP1   | C3H/scid | D28 | Bladder |
| 5A18NP1SD28M5J1 | GQ506444 | 5A18NP1   | C3H/scid | D28 | Joint   |
| 5A18NP1SD28M5J5 | GQ506445 | 5A18NP1   | C3H/scid | D28 | Joint   |
| 5A18NP1SD28M5S1 | GQ506446 | 5A18NP1   | C3H/scid | D28 | Skin    |
| 5A18NP1SD28M5S3 | GQ506447 | 5A18NP1   | C3H/scid | D28 | Skin    |
| 5A18NP1SD28M5S4 | GQ506448 | 5A18NP1   | C3H/scid | D28 | Skin    |
| ruvA1D7M1S02    | Parental | T11P01A01 | C3H/HeN  | D7  | Skin    |
| ruvA1D7M1S04    | Parental | T11P01A01 | C3H/HeN  | D7  | Skin    |
| ruvA1D7M1S05    | Parental | T11P01A01 | C3H/HeN  | D7  | Skin    |
| ruvA1D7M1S07    | Parental | T11P01A01 | C3H/HeN  | D7  | Skin    |
| ruvA1D7M1S09    | Parental | T11P01A01 | C3H/HeN  | D7  | Skin    |
| ruvA1D7M1S11    | Parental | T11P01A01 | C3H/HeN  | D7  | Skin    |
| ruvA1D7M1S12    | Parental | T11P01A01 | C3H/HeN  | D7  | Skin    |
| ruvA1D7M1S14    | Parental | T11P01A01 | C3H/HeN  | D7  | Skin    |
| ruvA1D7M1S15    | Parental | T11P01A01 | C3H/HeN  | D7  | Skin    |
| ruvA1D7M1S16    | Parental | T11P01A01 | C3H/HeN  | D7  | Skin    |
| ruvA1D7M1S17    | Parental | T11P01A01 | C3H/HeN  | D7  | Skin    |
| ruvA1D7M1S18    | Parental | T11P01A01 | C3H/HeN  | D7  | Skin    |





|               |          |           |         |     |       |
|---------------|----------|-----------|---------|-----|-------|
| ruvA1D7M4S04  | Parental | T11P01A01 | C3H/HeN | D7  | Skin  |
| ruvA1D7M4S05  | Parental | T11P01A01 | C3H/HeN | D7  | Skin  |
| ruvA1D7M4S06  | Parental | T11P01A01 | C3H/HeN | D7  | Skin  |
| ruvA1D7M4S07  | Parental | T11P01A01 | C3H/HeN | D7  | Skin  |
| ruvA1D7M4S08  | Parental | T11P01A01 | C3H/HeN | D7  | Skin  |
| ruvA1D7M4S09  | Parental | T11P01A01 | C3H/HeN | D7  | Skin  |
| ruvA1D7M4S10  | Parental | T11P01A01 | C3H/HeN | D7  | Skin  |
| ruvA1D7M4S11  | Parental | T11P01A01 | C3H/HeN | D7  | Skin  |
| ruvA1D7M4S12  | Parental | T11P01A01 | C3H/HeN | D7  | Skin  |
| ruvA1D7M4S13  | Parental | T11P01A01 | C3H/HeN | D7  | Skin  |
| ruvA1D7M4S14  | Parental | T11P01A01 | C3H/HeN | D7  | Skin  |
| ruvA1D7M4S15  | Parental | T11P01A01 | C3H/HeN | D7  | Skin  |
| ruvA1D7M4S16  | Parental | T11P01A01 | C3H/HeN | D7  | Skin  |
| ruvA1D7M4S17  | Parental | T11P01A01 | C3H/HeN | D7  | Skin  |
| ruvA1D7M4S18  | Parental | T11P01A01 | C3H/HeN | D7  | Skin  |
| ruvA1D7M4S19  | Parental | T11P01A01 | C3H/HeN | D7  | Skin  |
| ruvA1D7M4S20  | Parental | T11P01A01 | C3H/HeN | D7  | Skin  |
| ruvA1D7M5S01  | Parental | T11P01A01 | C3H/HeN | D7  | Skin  |
| ruvA1D7M5S03  | Parental | T11P01A01 | C3H/HeN | D7  | Skin  |
| ruvA1D7M5S04  | Parental | T11P01A01 | C3H/HeN | D7  | Skin  |
| ruvA1D7M5S05  | Parental | T11P01A01 | C3H/HeN | D7  | Skin  |
| ruvA1D7M5S06  | Parental | T11P01A01 | C3H/HeN | D7  | Skin  |
| ruvA1D7M5S07  | Parental | T11P01A01 | C3H/HeN | D7  | Skin  |
| ruvA1D7M5S08  | Parental | T11P01A01 | C3H/HeN | D7  | Skin  |
| ruvA1D7M5S09  | Parental | T11P01A01 | C3H/HeN | D7  | Skin  |
| ruvA1D7M5S10  | Parental | T11P01A01 | C3H/HeN | D7  | Skin  |
| ruvA1D7M5S11  | Parental | T11P01A01 | C3H/HeN | D7  | Skin  |
| ruvA1D7M5S12  | Parental | T11P01A01 | C3H/HeN | D7  | Skin  |
| ruvA1D7M5S13  | Parental | T11P01A01 | C3H/HeN | D7  | Skin  |
| ruvA1D7M5S14  | Parental | T11P01A01 | C3H/HeN | D7  | Skin  |
| ruvA1D7M5S15  | Parental | T11P01A01 | C3H/HeN | D7  | Skin  |
| ruvA1D7M5S16  | Parental | T11P01A01 | C3H/HeN | D7  | Skin  |
| ruvA1D7M5S17  | Parental | T11P01A01 | C3H/HeN | D7  | Skin  |
| ruvA1D7M5S18  | Parental | T11P01A01 | C3H/HeN | D7  | Skin  |
| ruvA1D7M5S19  | Parental | T11P01A01 | C3H/HeN | D7  | Skin  |
| ruvA1D7M5S20  | Parental | T11P01A01 | C3H/HeN | D7  | Skin  |
| ruvA1D7M5S21  | Parental | T11P01A01 | C3H/HeN | D7  | Skin  |
| ruvA1D7M5S22  | Parental | T11P01A01 | C3H/HeN | D7  | Skin  |
| ruvA1D7M5S23  | Parental | T11P01A01 | C3H/HeN | D7  | Skin  |
| ruvA1D7M5S24  | Parental | T11P01A01 | C3H/HeN | D7  | Skin  |
| ruvA1D14M1J02 | Parental | T11P01A01 | C3H/HeN | D14 | Joint |
| ruvA1D14M1J03 | Parental | T11P01A01 | C3H/HeN | D14 | Joint |
| ruvA1D14M1J04 | Parental | T11P01A01 | C3H/HeN | D14 | Joint |
| ruvA1D14M1J05 | Parental | T11P01A01 | C3H/HeN | D14 | Joint |
| ruvA1D14M1J06 | Parental | T11P01A01 | C3H/HeN | D14 | Joint |
| ruvA1D14M1J07 | Parental | T11P01A01 | C3H/HeN | D14 | Joint |
| ruvA1D14M1J09 | Parental | T11P01A01 | C3H/HeN | D14 | Joint |

|               |          |           |         |     |         |
|---------------|----------|-----------|---------|-----|---------|
| ruvA1D14M1J10 | Parental | T11P01A01 | C3H/HeN | D14 | Joint   |
| ruvA1D14M2J01 | Parental | T11P01A01 | C3H/HeN | D14 | Joint   |
| ruvA1D14M2J02 | Parental | T11P01A01 | C3H/HeN | D14 | Joint   |
| ruvA1D14M2J05 | Parental | T11P01A01 | C3H/HeN | D14 | Joint   |
| ruvA1D14M2J09 | Parental | T11P01A01 | C3H/HeN | D14 | Joint   |
| ruvA1D14M2J10 | Parental | T11P01A01 | C3H/HeN | D14 | Joint   |
| ruvA1D14M3J05 | Parental | T11P01A01 | C3H/HeN | D14 | Joint   |
| ruvA1D14M3J08 | Parental | T11P01A01 | C3H/HeN | D14 | Joint   |
| ruvA1D14M3J10 | Parental | T11P01A01 | C3H/HeN | D14 | Joint   |
| ruvA1D28M1S04 | GQ369323 | T11P01A01 | C3H/HeN | D28 | Skin    |
| ruvA1D28M1S07 | GQ369324 | T11P01A01 | C3H/HeN | D28 | Skin    |
| ruvA1D28M1S12 | GQ369325 | T11P01A01 | C3H/HeN | D28 | Skin    |
| ruvA1D28M1S14 | GQ369326 | T11P01A01 | C3H/HeN | D28 | Skin    |
| ruvA1D28M1S15 | GQ369327 | T11P01A01 | C3H/HeN | D28 | Skin    |
| ruvA1D28M1S16 | GQ369328 | T11P01A01 | C3H/HeN | D28 | Skin    |
| ruvA1D28M1S17 | GQ369329 | T11P01A01 | C3H/HeN | D28 | Skin    |
| ruvA1D28M1S20 | GQ369330 | T11P01A01 | C3H/HeN | D28 | Skin    |
| ruvA1D28M1S21 | GQ369331 | T11P01A01 | C3H/HeN | D28 | Skin    |
| ruvA1D28M1S22 | GQ369332 | T11P01A01 | C3H/HeN | D28 | Skin    |
| ruvA1D28M1S24 | GQ369333 | T11P01A01 | C3H/HeN | D28 | Skin    |
| ruvA1D28M1S25 | GQ369334 | T11P01A01 | C3H/HeN | D28 | Skin    |
| ruvA1D28M2J01 | GQ369386 | T11P01A01 | C3H/HeN | D28 | Joint   |
| ruvA1D28M2J03 | GQ369387 | T11P01A01 | C3H/HeN | D28 | Joint   |
| ruvA1D28M2J06 | GQ369388 | T11P01A01 | C3H/HeN | D28 | Joint   |
| ruvA1D28M2J08 | GQ369389 | T11P01A01 | C3H/HeN | D28 | Joint   |
| ruvA1D28M2J09 | GQ369390 | T11P01A01 | C3H/HeN | D28 | Joint   |
| ruvA1D28M2J10 | GQ369391 | T11P01A01 | C3H/HeN | D28 | Joint   |
| ruvA1D28M2J11 | GQ369392 | T11P01A01 | C3H/HeN | D28 | Joint   |
| ruvA1D28M2J13 | GQ369393 | T11P01A01 | C3H/HeN | D28 | Joint   |
| ruvA1D28M2J14 | GQ369394 | T11P01A01 | C3H/HeN | D28 | Joint   |
| ruvA1D28M2J16 | GQ369395 | T11P01A01 | C3H/HeN | D28 | Joint   |
| ruvA1D28M2J17 | GQ369396 | T11P01A01 | C3H/HeN | D28 | Joint   |
| ruvA1D28M2J18 | GQ369397 | T11P01A01 | C3H/HeN | D28 | Joint   |
| ruvA1D28M2J19 | GQ369398 | T11P01A01 | C3H/HeN | D28 | Joint   |
| ruvA1D28M2J20 | GQ369399 | T11P01A01 | C3H/HeN | D28 | Joint   |
| ruvA1D28M2J22 | GQ369400 | T11P01A01 | C3H/HeN | D28 | Joint   |
| ruvA1D28M2J23 | GQ369401 | T11P01A01 | C3H/HeN | D28 | Joint   |
| ruvA1D28M2J24 | GQ369402 | T11P01A01 | C3H/HeN | D28 | Joint   |
| ruvA1D28M3B01 | GQ369356 | T11P01A01 | C3H/HeN | D28 | Bladder |
| ruvA1D28M3B03 | GQ369357 | T11P01A01 | C3H/HeN | D28 | Bladder |
| ruvA1D28M3B04 | GQ369358 | T11P01A01 | C3H/HeN | D28 | Bladder |
| ruvA1D28M3B07 | GQ369359 | T11P01A01 | C3H/HeN | D28 | Bladder |
| ruvA1D28M3B09 | GQ369360 | T11P01A01 | C3H/HeN | D28 | Bladder |
| ruvA1D28M3B10 | GQ369361 | T11P01A01 | C3H/HeN | D28 | Bladder |
| ruvA1D28M3B11 | GQ369362 | T11P01A01 | C3H/HeN | D28 | Bladder |
| ruvA1D28M3B14 | GQ369363 | T11P01A01 | C3H/HeN | D28 | Bladder |
| ruvA1D28M3B15 | GQ369364 | T11P01A01 | C3H/HeN | D28 | Bladder |

|               |          |           |         |     |         |
|---------------|----------|-----------|---------|-----|---------|
| ruvA1D28M3B18 | GQ369365 | T11P01A01 | C3H/HeN | D28 | Bladder |
| ruvA1D28M3B19 | GQ369366 | T11P01A01 | C3H/HeN | D28 | Bladder |
| ruvA1D28M3B20 | GQ369367 | T11P01A01 | C3H/HeN | D28 | Bladder |
| ruvA1D28M3B21 | GQ369368 | T11P01A01 | C3H/HeN | D28 | Bladder |
| ruvA1D28M3B22 | GQ369369 | T11P01A01 | C3H/HeN | D28 | Bladder |
| ruvA1D28M3B24 | GQ369370 | T11P01A01 | C3H/HeN | D28 | Bladder |
| ruvA1D28M3B31 | GQ369371 | T11P01A01 | C3H/HeN | D28 | Bladder |
| ruvA1D28M3B32 | GQ369372 | T11P01A01 | C3H/HeN | D28 | Bladder |
| ruvA1D28M3B33 | GQ369373 | T11P01A01 | C3H/HeN | D28 | Bladder |
| ruvA1D28M3B37 | GQ369374 | T11P01A01 | C3H/HeN | D28 | Bladder |
| ruvA1D28M3B38 | GQ369375 | T11P01A01 | C3H/HeN | D28 | Bladder |
| ruvA1D28M3B39 | GQ369376 | T11P01A01 | C3H/HeN | D28 | Bladder |
| ruvA1D28M3B41 | GQ369377 | T11P01A01 | C3H/HeN | D28 | Bladder |
| ruvA1D28M3B42 | GQ369378 | T11P01A01 | C3H/HeN | D28 | Bladder |
| ruvA1D28M3B44 | GQ369379 | T11P01A01 | C3H/HeN | D28 | Bladder |
| ruvA1D28M3B45 | GQ369380 | T11P01A01 | C3H/HeN | D28 | Bladder |
| ruvA1D28M3B46 | GQ369381 | T11P01A01 | C3H/HeN | D28 | Bladder |
| ruvA1D28M3B47 | GQ369382 | T11P01A01 | C3H/HeN | D28 | Bladder |
| ruvA1D28M3B48 | GQ369383 | T11P01A01 | C3H/HeN | D28 | Bladder |
| ruvA1D28M3B49 | GQ369384 | T11P01A01 | C3H/HeN | D28 | Bladder |
| ruvA1D28M3B51 | GQ369385 | T11P01A01 | C3H/HeN | D28 | Bladder |
| ruvA1D28M3J02 | GQ369348 | T11P01A01 | C3H/HeN | D28 | Joint   |
| ruvA1D28M3J08 | GQ369349 | T11P01A01 | C3H/HeN | D28 | Joint   |
| ruvA1D28M3J14 | GQ369350 | T11P01A01 | C3H/HeN | D28 | Joint   |
| ruvA1D28M3J16 | GQ369351 | T11P01A01 | C3H/HeN | D28 | Joint   |
| ruvA1D28M3J19 | GQ369352 | T11P01A01 | C3H/HeN | D28 | Joint   |
| ruvA1D28M3J20 | GQ369353 | T11P01A01 | C3H/HeN | D28 | Joint   |
| ruvA1D28M3J21 | GQ369354 | T11P01A01 | C3H/HeN | D28 | Joint   |
| ruvA1D28M3J23 | GQ369355 | T11P01A01 | C3H/HeN | D28 | Joint   |
| ruvA1D28M3S02 | GQ369335 | T11P01A01 | C3H/HeN | D28 | Skin    |
| ruvA1D28M3S04 | GQ369336 | T11P01A01 | C3H/HeN | D28 | Skin    |
| ruvA1D28M3S05 | GQ369337 | T11P01A01 | C3H/HeN | D28 | Skin    |
| ruvA1D28M3S06 | GQ369338 | T11P01A01 | C3H/HeN | D28 | Skin    |
| ruvA1D28M3S08 | GQ369339 | T11P01A01 | C3H/HeN | D28 | Skin    |
| ruvA1D28M3S09 | GQ369340 | T11P01A01 | C3H/HeN | D28 | Skin    |
| ruvA1D28M3S10 | GQ369341 | T11P01A01 | C3H/HeN | D28 | Skin    |
| ruvA1D28M3S12 | GQ369342 | T11P01A01 | C3H/HeN | D28 | Skin    |
| ruvA1D28M3S15 | GQ369343 | T11P01A01 | C3H/HeN | D28 | Skin    |
| ruvA1D28M3S19 | GQ369344 | T11P01A01 | C3H/HeN | D28 | Skin    |
| ruvA1D28M3S21 | GQ369345 | T11P01A01 | C3H/HeN | D28 | Skin    |
| ruvA1D28M3S22 | GQ369346 | T11P01A01 | C3H/HeN | D28 | Skin    |
| ruvA1D28M3S24 | GQ369347 | T11P01A01 | C3H/HeN | D28 | Skin    |
| ruvA1D28M4H2  | GQ369321 | T11P01A01 | C3H/HeN | D28 | Heart   |
| ruvA1D28M4H24 | GQ369312 | T11P01A01 | C3H/HeN | D28 | Heart   |
| ruvA1D28M4H27 | GQ369313 | T11P01A01 | C3H/HeN | D28 | Heart   |
| ruvA1D28M4H4  | GQ369314 | T11P01A01 | C3H/HeN | D28 | Heart   |
| ruvA1D28M4H5  | GQ369315 | T11P01A01 | C3H/HeN | D28 | Heart   |

|               |          |           |          |     |         |
|---------------|----------|-----------|----------|-----|---------|
| ruvA1D28M4H5  | GQ369322 | T11P01A01 | C3H/HeN  | D28 | Heart   |
| ruvA1D28M4J10 | GQ369316 | T11P01A01 | C3H/HeN  | D28 | Joint   |
| ruvA1D28M4J3  | Parental | T11P01A01 | C3H/HeN  | D28 | Joint   |
| ruvA1D28M4J5  | GQ369318 | T11P01A01 | C3H/HeN  | D28 | Joint   |
| ruvA1D28M4J8  | Parental | T11P01A01 | C3H/HeN  | D28 | Joint   |
| ruvA1D28M4J9  | Parental | T11P01A01 | C3H/HeN  | D28 | Joint   |
| ruvA1D28M5H1  | GQ369299 | T11P01A01 | C3H/HeN  | D28 | Heart   |
| ruvA1D28M5H2  | GQ369300 | T11P01A01 | C3H/HeN  | D28 | Heart   |
| ruvA1D28M5H5  | GQ369301 | T11P01A01 | C3H/HeN  | D28 | Heart   |
| ruvA1D28M5H6  | GQ369302 | T11P01A01 | C3H/HeN  | D28 | Heart   |
| ruvA1D28M5H7  | GQ369303 | T11P01A01 | C3H/HeN  | D28 | Heart   |
| ruvA1D28M5H8  | GQ369304 | T11P01A01 | C3H/HeN  | D28 | Heart   |
| ruvA1D28M5H9  | GQ369305 | T11P01A01 | C3H/HeN  | D28 | Heart   |
| ruvA1D28M5J1  | GQ369306 | T11P01A01 | C3H/HeN  | D28 | Joint   |
| ruvA1D28M5J3  | GQ369307 | T11P01A01 | C3H/HeN  | D28 | Joint   |
| ruvA1D28M5J4  | GQ369308 | T11P01A01 | C3H/HeN  | D28 | Joint   |
| ruvA1D28M5J9  | GQ369309 | T11P01A01 | C3H/HeN  | D28 | Joint   |
| ruvA1D28M5S1  | GQ369310 | T11P01A01 | C3H/HeN  | D28 | Skin    |
| ruvA1D28M5S6  | GQ369311 | T11P01A01 | C3H/HeN  | D28 | Skin    |
| ruvA1D28M6B2  | GQ369289 | T11P01A01 | C3H/HeN  | D28 | Bladder |
| ruvA1D28M6B3  | GQ369290 | T11P01A01 | C3H/HeN  | D28 | Bladder |
| ruvA1D28M6B4  | GQ369291 | T11P01A01 | C3H/HeN  | D28 | Bladder |
| ruvA1D28M6B6  | GQ369292 | T11P01A01 | C3H/HeN  | D28 | Bladder |
| ruvA1D28M6B7  | GQ369293 | T11P01A01 | C3H/HeN  | D28 | Bladder |
| ruvA1D28M6B8  | GQ369294 | T11P01A01 | C3H/HeN  | D28 | Bladder |
| ruvA1D28M6S1  | GQ369295 | T11P01A01 | C3H/HeN  | D28 | Skin    |
| ruvA1D28M6S4  | GQ369296 | T11P01A01 | C3H/HeN  | D28 | Skin    |
| ruvA1D28M6S6  | GQ369297 | T11P01A01 | C3H/HeN  | D28 | Skin    |
| ruvA1D28M6S8  | GQ369298 | T11P01A01 | C3H/HeN  | D28 | Skin    |
| ruvA1SD14M1B1 | Parental | T11P01A01 | C3H/scid | D14 | Bladder |
| ruvA1SD14M1B2 | Parental | T11P01A01 | C3H/scid | D14 | Bladder |
| ruvA1SD14M1B3 | Parental | T11P01A01 | C3H/scid | D14 | Bladder |
| ruvA1SD14M1B4 | Parental | T11P01A01 | C3H/scid | D14 | Bladder |
| ruvA1SD14M1B5 | Parental | T11P01A01 | C3H/scid | D14 | Skin    |
| ruvA1SD14M1H1 | Parental | T11P01A01 | C3H/scid | D14 | Heart   |
| ruvA1SD14M1H2 | Parental | T11P01A01 | C3H/scid | D14 | Heart   |
| ruvA1SD14M1H5 | Parental | T11P01A01 | C3H/scid | D14 | Heart   |
| ruvA1SD14M1H6 | Parental | T11P01A01 | C3H/scid | D14 | Heart   |
| ruvA1SD14M1J1 | Parental | T11P01A01 | C3H/scid | D14 | Joint   |
| ruvA1SD14M1J2 | Parental | T11P01A01 | C3H/scid | D14 | Joint   |
| ruvA1SD14M1J3 | Parental | T11P01A01 | C3H/scid | D14 | Joint   |
| ruvA1SD14M1J5 | Parental | T11P01A01 | C3H/scid | D14 | Joint   |
| ruvA1SD14M1S2 | Parental | T11P01A01 | C3H/scid | D14 | Skin    |
| ruvA1SD14M1S5 | Parental | T11P01A01 | C3H/scid | D14 | Skin    |
| ruvA1SD14M1S6 | Parental | T11P01A01 | C3H/scid | D14 | Skin    |
| ruvA1SD14M2B1 | Parental | T11P01A01 | C3H/scid | D14 | Bladder |
| ruvA1SD14M2B2 | Parental | T11P01A01 | C3H/scid | D14 | Bladder |

|               |          |           |          |     |         |
|---------------|----------|-----------|----------|-----|---------|
| ruvA1SD14M2B4 | Parental | T11P01A01 | C3H/scid | D14 | Bladder |
| ruvA1SD14M2B6 | Parental | T11P01A01 | C3H/scid | D14 | Bladder |
| ruvA1SD14M2H2 | Parental | T11P01A01 | C3H/scid | D14 | Heart   |
| ruvA1SD14M2H4 | Parental | T11P01A01 | C3H/scid | D14 | Heart   |
| ruvA1SD14M2H5 | Parental | T11P01A01 | C3H/scid | D14 | Heart   |
| ruvA1SD14M2H6 | Parental | T11P01A01 | C3H/scid | D14 | Heart   |
| ruvA1SD14M2J1 | Parental | T11P01A01 | C3H/scid | D14 | Joint   |
| ruvA1SD14M2J2 | Parental | T11P01A01 | C3H/scid | D14 | Joint   |
| ruvA1SD14M2J3 | Parental | T11P01A01 | C3H/scid | D14 | Joint   |
| ruvA1SD14M2J4 | Parental | T11P01A01 | C3H/scid | D14 | Joint   |
| ruvA1SD14M2J5 | Parental | T11P01A01 | C3H/scid | D14 | Joint   |
| ruvA1SD14M2J6 | Parental | T11P01A01 | C3H/scid | D14 | Joint   |
| ruvA1SD14M2S2 | Parental | T11P01A01 | C3H/scid | D14 | Skin    |
| ruvA1SD14M2S4 | Parental | T11P01A01 | C3H/scid | D14 | Skin    |
| ruvA1SD14M2S5 | Parental | T11P01A01 | C3H/scid | D14 | Skin    |
| ruvA1SD14M2S6 | Parental | T11P01A01 | C3H/scid | D14 | Skin    |
| ruvA1SD14M3B1 | Parental | T11P01A01 | C3H/scid | D14 | Bladder |
| ruvA1SD14M3B2 | Parental | T11P01A01 | C3H/scid | D14 | Bladder |
| ruvA1SD14M3B4 | Parental | T11P01A01 | C3H/scid | D14 | Bladder |
| ruvA1SD14M3B5 | Parental | T11P01A01 | C3H/scid | D14 | Bladder |
| ruvA1SD14M3B6 | Parental | T11P01A01 | C3H/scid | D14 | Bladder |
| ruvA1SD14M3H1 | Parental | T11P01A01 | C3H/scid | D14 | Heart   |
| ruvA1SD14M3H2 | Parental | T11P01A01 | C3H/scid | D14 | Heart   |
| ruvA1SD14M3H3 | Parental | T11P01A01 | C3H/scid | D14 | Heart   |
| ruvA1SD14M3H5 | Parental | T11P01A01 | C3H/scid | D14 | Heart   |
| ruvA1SD14M3H6 | Parental | T11P01A01 | C3H/scid | D14 | Heart   |
| ruvA1SD14M3J1 | Parental | T11P01A01 | C3H/scid | D14 | Joint   |
| ruvA1SD14M3J3 | Parental | T11P01A01 | C3H/scid | D14 | Joint   |
| ruvA1SD14M3J4 | Parental | T11P01A01 | C3H/scid | D14 | Joint   |
| ruvA1SD14M3J5 | Parental | T11P01A01 | C3H/scid | D14 | Joint   |
| ruvA1SD14M3J6 | Parental | T11P01A01 | C3H/scid | D14 | Joint   |
| ruvA1SD14M3S1 | Parental | T11P01A01 | C3H/scid | D14 | Skin    |
| ruvA1SD14M3S4 | Parental | T11P01A01 | C3H/scid | D14 | Skin    |
| ruvA1SD14M3S5 | Parental | T11P01A01 | C3H/scid | D14 | Skin    |
| ruvA1SD14M3S6 | Parental | T11P01A01 | C3H/scid | D14 | Skin    |
| ruvA1SD14M4B2 | Parental | T11P01A01 | C3H/scid | D14 | Bladder |
| ruvA1SD14M4B3 | Parental | T11P01A01 | C3H/scid | D14 | Bladder |
| ruvA1SD14M4B4 | Parental | T11P01A01 | C3H/scid | D14 | Bladder |
| ruvA1SD14M4H3 | Parental | T11P01A01 | C3H/scid | D14 | Heart   |
| ruvA1SD14M4H6 | Parental | T11P01A01 | C3H/scid | D14 | Heart   |
| ruvA1SD14M4J1 | Parental | T11P01A01 | C3H/scid | D14 | Joint   |
| ruvA1SD14M4J3 | Parental | T11P01A01 | C3H/scid | D14 | Joint   |
| ruvA1SD14M4J4 | Parental | T11P01A01 | C3H/scid | D14 | Joint   |
| ruvA1SD14M4J5 | Parental | T11P01A01 | C3H/scid | D14 | Joint   |
| ruvA1SD14M4J6 | Parental | T11P01A01 | C3H/scid | D14 | Joint   |
| ruvA1SD14M4S1 | Parental | T11P01A01 | C3H/scid | D14 | Skin    |
| ruvA1SD14M4S2 | Parental | T11P01A01 | C3H/scid | D14 | Skin    |

|               |          |           |          |     |         |
|---------------|----------|-----------|----------|-----|---------|
| ruvA1SD14M4S3 | Parental | T11P01A01 | C3H/scid | D14 | Skin    |
| ruvA1SD14M4S4 | Parental | T11P01A01 | C3H/scid | D14 | Skin    |
| ruvA1SD14M4S5 | Parental | T11P01A01 | C3H/scid | D14 | Skin    |
| ruvA1SD14M4S6 | Parental | T11P01A01 | C3H/scid | D14 | Skin    |
| ruvA1SD14M5B1 | Parental | T11P01A01 | C3H/scid | D14 | Bladder |
| ruvA1SD14M5B3 | Parental | T11P01A01 | C3H/scid | D14 | Bladder |
| ruvA1SD14M5B5 | Parental | T11P01A01 | C3H/scid | D14 | Bladder |
| ruvA1SD14M5H2 | Parental | T11P01A01 | C3H/scid | D14 | Heart   |
| ruvA1SD14M5H3 | Parental | T11P01A01 | C3H/scid | D14 | Heart   |
| ruvA1SD14M5H5 | Parental | T11P01A01 | C3H/scid | D14 | Heart   |
| ruvA1SD14M5J1 | Parental | T11P01A01 | C3H/scid | D14 | Joint   |
| ruvA1SD14M5J3 | Parental | T11P01A01 | C3H/scid | D14 | Joint   |
| ruvA1SD14M5J4 | Parental | T11P01A01 | C3H/scid | D14 | Joint   |
| ruvA1SD14M5J5 | Parental | T11P01A01 | C3H/scid | D14 | Joint   |
| ruvA1SD14M5S1 | Parental | T11P01A01 | C3H/scid | D14 | Skin    |
| ruvA1SD14M5S2 | Parental | T11P01A01 | C3H/scid | D14 | Skin    |
| ruvA1SD14M5S3 | Parental | T11P01A01 | C3H/scid | D14 | Skin    |
| ruvA1SD14M5S4 | Parental | T11P01A01 | C3H/scid | D14 | Skin    |
| ruvA1SD14M5S5 | Parental | T11P01A01 | C3H/scid | D14 | Skin    |
| ruvA1SD14M5S6 | Parental | T11P01A01 | C3H/scid | D14 | Skin    |
| ruvA1SD28M1B1 | Parental | T11P01A01 | C3H/scid | D28 | Bladder |
| ruvA1SD28M1B3 | Parental | T11P01A01 | C3H/scid | D28 | Bladder |
| ruvA1SD28M1B4 | Parental | T11P01A01 | C3H/scid | D28 | Bladder |
| ruvA1SD28M1B6 | Parental | T11P01A01 | C3H/scid | D28 | Bladder |
| ruvA1SD28M1H1 | Parental | T11P01A01 | C3H/scid | D28 | Heart   |
| ruvA1SD28M1H2 | Parental | T11P01A01 | C3H/scid | D28 | Heart   |
| ruvA1SD28M1H2 | Parental | T11P01A01 | C3H/scid | D28 | Heart   |
| ruvA1SD28M1H4 | Parental | T11P01A01 | C3H/scid | D28 | Heart   |
| ruvA1SD28M1H4 | Parental | T11P01A01 | C3H/scid | D28 | Heart   |
| ruvA1SD28M1H5 | Parental | T11P01A01 | C3H/scid | D28 | Heart   |
| ruvA1SD28M1H6 | Parental | T11P01A01 | C3H/scid | D28 | Heart   |
| ruvA1SD28M1H6 | Parental | T11P01A01 | C3H/scid | D28 | Heart   |
| ruvA1SD28M1J6 | Parental | T11P01A01 | C3H/scid | D28 | Joint   |
| ruvA1SD28M1S1 | Parental | T11P01A01 | C3H/scid | D28 | Skin    |
| ruvA1SD28M1S2 | Parental | T11P01A01 | C3H/scid | D28 | Skin    |
| ruvA1SD28M1S3 | Parental | T11P01A01 | C3H/scid | D28 | Skin    |
| ruvA1SD28M1S3 | Parental | T11P01A01 | C3H/scid | D28 | Skin    |
| ruvA1SD28M1S4 | Parental | T11P01A01 | C3H/scid | D28 | Skin    |
| ruvA1SD28M1S5 | Parental | T11P01A01 | C3H/scid | D28 | Skin    |
| ruvA1SD28M1S5 | Parental | T11P01A01 | C3H/scid | D28 | Skin    |
| ruvA1SD28M1S6 | Parental | T11P01A01 | C3H/scid | D28 | Skin    |
| ruvA1SD28M1S6 | Parental | T11P01A01 | C3H/scid | D28 | Skin    |
| ruvA1SD28M2B3 | Parental | T11P01A01 | C3H/scid | D28 | Bladder |
| ruvA1SD28M2B4 | Parental | T11P01A01 | C3H/scid | D28 | Bladder |
| ruvA1SD28M2J1 | Parental | T11P01A01 | C3H/scid | D28 | Joint   |
| ruvA1SD28M2J2 | Parental | T11P01A01 | C3H/scid | D28 | Joint   |
| ruvA1SD28M2J3 | Parental | T11P01A01 | C3H/scid | D28 | Joint   |

|               |          |           |          |     |         |
|---------------|----------|-----------|----------|-----|---------|
| ruvA1SD28M2J4 | Parental | T11P01A01 | C3H/scid | D28 | Joint   |
| ruvA1SD28M2J6 | Parental | T11P01A01 | C3H/scid | D28 | Joint   |
| ruvA1SD28M2S1 | Parental | T11P01A01 | C3H/scid | D28 | Skin    |
| ruvA1SD28M2S2 | Parental | T11P01A01 | C3H/scid | D28 | Skin    |
| ruvA1SD28M2S3 | Parental | T11P01A01 | C3H/scid | D28 | Skin    |
| ruvA1SD28M3B3 | Parental | T11P01A01 | C3H/scid | D28 | Bladder |
| ruvA1SD28M3B4 | Parental | T11P01A01 | C3H/scid | D28 | Bladder |
| ruvA1SD28M3B5 | Parental | T11P01A01 | C3H/scid | D28 | Bladder |
| ruvA1SD28M3H4 | Parental | T11P01A01 | C3H/scid | D28 | Heart   |
| ruvA1SD28M3J1 | Parental | T11P01A01 | C3H/scid | D28 | Joint   |
| ruvA1SD28M3J2 | Parental | T11P01A01 | C3H/scid | D28 | Joint   |
| ruvA1SD28M3J3 | Parental | T11P01A01 | C3H/scid | D28 | Joint   |
| ruvA1SD28M3J4 | Parental | T11P01A01 | C3H/scid | D28 | Joint   |
| ruvA1SD28M3J5 | Parental | T11P01A01 | C3H/scid | D28 | Joint   |
| ruvA1SD28M3J6 | Parental | T11P01A01 | C3H/scid | D28 | Joint   |
| ruvA1SD28M3J7 | Parental | T11P01A01 | C3H/scid | D28 | Joint   |
| ruvA1SD28M3J8 | Parental | T11P01A01 | C3H/scid | D28 | Joint   |
| ruvA1SD28M3S2 | Parental | T11P01A01 | C3H/scid | D28 | Skin    |
| ruvA1SD28M4B4 | Parental | T11P01A01 | C3H/scid | D28 | Bladder |
| ruvA1SD28M4J1 | Parental | T11P01A01 | C3H/scid | D28 | Joint   |
| ruvA1SD28M4J6 | Parental | T11P01A01 | C3H/scid | D28 | Joint   |
| ruvA1SD28M4S3 | Parental | T11P01A01 | C3H/scid | D28 | Skin    |
| ruvA1SD28M4S4 | Parental | T11P01A01 | C3H/scid | D28 | Skin    |
| ruvA1SD28M5B1 | Parental | T11P01A01 | C3H/scid | D28 | Bladder |
| ruvA1SD28M5B3 | Parental | T11P01A01 | C3H/scid | D28 | Bladder |
| ruvA1SD28M5B4 | Parental | T11P01A01 | C3H/scid | D28 | Bladder |
| ruvA1SD28M5B6 | Parental | T11P01A01 | C3H/scid | D28 | Bladder |
| ruvA1SD28M5H2 | Parental | T11P01A01 | C3H/scid | D28 | Heart   |
| ruvA1SD28M5H3 | Parental | T11P01A01 | C3H/scid | D28 | Heart   |
| ruvA1SD28M5H5 | Parental | T11P01A01 | C3H/scid | D28 | Heart   |
| ruvA1SD28M5H6 | Parental | T11P01A01 | C3H/scid | D28 | Heart   |
| ruvA1SD28M5J2 | Parental | T11P01A01 | C3H/scid | D28 | Joint   |
| ruvA1SD28M5J3 | Parental | T11P01A01 | C3H/scid | D28 | Joint   |
| ruvA1SD28M5J4 | Parental | T11P01A01 | C3H/scid | D28 | Joint   |
| ruvA1SD28M5J5 | Parental | T11P01A01 | C3H/scid | D28 | Joint   |
| ruvA1SD28M5J6 | Parental | T11P01A01 | C3H/scid | D28 | Joint   |
| ruvA1SD28M5J7 | Parental | T11P01A01 | C3H/scid | D28 | Joint   |
| ruvA1SD28M5S2 | Parental | T11P01A01 | C3H/scid | D28 | Skin    |
| ruvA1SD28M5S4 | Parental | T11P01A01 | C3H/scid | D28 | Skin    |
| ruvA1SD28M5S5 | Parental | T11P01A01 | C3H/scid | D28 | Skin    |
| ruvA1SD28M5S6 | Parental | T11P01A01 | C3H/scid | D28 | Skin    |
| ruvB1D7M1S3   | Parental | T03TC051  | C3H/HeN  | D7  | Skin    |
| ruvB1D7M1S5   | Parental | T03TC051  | C3H/HeN  | D7  | Skin    |
| ruvB1D7M1S7   | Parental | T03TC051  | C3H/HeN  | D7  | Skin    |
| ruvB1D7M1S8   | Parental | T03TC051  | C3H/HeN  | D7  | Skin    |
| ruvB1D7M2S1   | Parental | T03TC051  | C3H/HeN  | D7  | Skin    |
| ruvB1D7M2S2   | Parental | T03TC051  | C3H/HeN  | D7  | Skin    |

|              |          |          |         |     |         |
|--------------|----------|----------|---------|-----|---------|
| ruvB1D7M2S4  | Parental | T03TC051 | C3H/HeN | D7  | Skin    |
| ruvB1D7M2S5  | Parental | T03TC051 | C3H/HeN | D7  | Skin    |
| ruvB1D7M2S6  | Parental | T03TC051 | C3H/HeN | D7  | Skin    |
| ruvB1D7M2S7  | Parental | T03TC051 | C3H/HeN | D7  | Skin    |
| ruvB1D7M2S8  | Parental | T03TC051 | C3H/HeN | D7  | Skin    |
| ruvB1D7M3S4  | Parental | T03TC051 | C3H/HeN | D7  | Skin    |
| ruvB1D7M3S5  | Parental | T03TC051 | C3H/HeN | D7  | Skin    |
| ruvB1D7M3S6  | Parental | T03TC051 | C3H/HeN | D7  | Skin    |
| ruvB1D7M3S7  | Parental | T03TC051 | C3H/HeN | D7  | Skin    |
| ruvB1D7M4S2  | Parental | T03TC051 | C3H/HeN | D7  | Skin    |
| ruvB1D7M4S3  | Parental | T03TC051 | C3H/HeN | D7  | Skin    |
| ruvB1D7M4S4  | Parental | T03TC051 | C3H/HeN | D7  | Skin    |
| ruvB1D7M4S5  | Parental | T03TC051 | C3H/HeN | D7  | Skin    |
| ruvB1D7M4S6  | Parental | T03TC051 | C3H/HeN | D7  | Skin    |
| ruvB1D7M4S7  | Parental | T03TC051 | C3H/HeN | D7  | Skin    |
| ruvB1D7M4S8  | Parental | T03TC051 | C3H/HeN | D7  | Skin    |
| ruvB1D28M1B7 | GU062653 | T03TC051 | C3H/HeN | D28 | Bladder |
| ruvB1D28M1H2 | GU062654 | T03TC051 | C3H/HeN | D28 | Heart   |
| ruvB1D28M1H3 | GU062655 | T03TC051 | C3H/HeN | D28 | Heart   |
| ruvB1D28M1H4 | GU062656 | T03TC051 | C3H/HeN | D28 | Heart   |
| ruvB1D28M1H5 | GU062657 | T03TC051 | C3H/HeN | D28 | Heart   |
| ruvB1D28M1H6 | GU062658 | T03TC051 | C3H/HeN | D28 | Heart   |
| ruvB1D28M1H7 | GU062659 | T03TC051 | C3H/HeN | D28 | Heart   |
| ruvB1D28M1J3 | GU062660 | T03TC051 | C3H/HeN | D28 | Joint   |
| ruvB1D28M1J4 | GU062661 | T03TC051 | C3H/HeN | D28 | Joint   |
| ruvB1D28M1J5 | GU062662 | T03TC051 | C3H/HeN | D28 | Joint   |
| ruvB1D28M1S4 | GU062663 | T03TC051 | C3H/HeN | D28 | Skin    |
| ruvB1D28M1S5 | GU062664 | T03TC051 | C3H/HeN | D28 | Skin    |
| ruvB1D28M1S6 | GU062665 | T03TC051 | C3H/HeN | D28 | Skin    |
| ruvB1D28M1S7 | GU062666 | T03TC051 | C3H/HeN | D28 | Skin    |
| ruvB1D28M2B1 | GU062667 | T03TC051 | C3H/HeN | D28 | Bladder |
| ruvB1D28M2B2 | GU062668 | T03TC051 | C3H/HeN | D28 | Bladder |
| ruvB1D28M2B4 | GU062669 | T03TC051 | C3H/HeN | D28 | Bladder |
| ruvB1D28M2B5 | GU062670 | T03TC051 | C3H/HeN | D28 | Bladder |
| ruvB1D28M2J1 | GU062671 | T03TC051 | C3H/HeN | D28 | Joint   |
| ruvB1D28M2J2 | GU062672 | T03TC051 | C3H/HeN | D28 | Joint   |
| ruvB1D28M2J3 | GU062673 | T03TC051 | C3H/HeN | D28 | Joint   |
| ruvB1D28M2J5 | GU062674 | T03TC051 | C3H/HeN | D28 | Joint   |
| ruvB1D28M2J7 | GU062675 | T03TC051 | C3H/HeN | D28 | Joint   |
| ruvB1D28M2S2 | GU062676 | T03TC051 | C3H/HeN | D28 | Skin    |
| ruvB1D28M2S3 | GU062677 | T03TC051 | C3H/HeN | D28 | Skin    |
| ruvB1D28M2S5 | GU062678 | T03TC051 | C3H/HeN | D28 | Skin    |
| ruvB1D28M2S6 | GU062679 | T03TC051 | C3H/HeN | D28 | Skin    |
| ruvB1D28M2S8 | GU062680 | T03TC051 | C3H/HeN | D28 | Skin    |
| ruvB1D28M3H2 | GU062641 | T03TC051 | C3H/HeN | D28 | Heart   |
| ruvB1D28M3H3 | GU062642 | T03TC051 | C3H/HeN | D28 | Heart   |
| ruvB1D28M3H5 | GU062643 | T03TC051 | C3H/HeN | D28 | Heart   |



|              |          |          |         |     |       |
|--------------|----------|----------|---------|-----|-------|
| ruvB1D28M3H6 | GU062644 | T03TC051 | C3H/HeN | D28 | Heart |
| ruvB1D28M3H7 | GU062645 | T03TC051 | C3H/HeN | D28 | Heart |
| ruvB1D28M3J2 | Parental | T03TC051 | C3H/HeN | D28 | Joint |
| ruvB1D28M3J3 | Parental | T03TC051 | C3H/HeN | D28 | Joint |
| ruvB1D28M3J4 | Parental | T03TC051 | C3H/HeN | D28 | Joint |
| ruvB1D28M3J5 | Parental | T03TC051 | C3H/HeN | D28 | Joint |
| ruvB1D28M3J6 | Parental | T03TC051 | C3H/HeN | D28 | Joint |
| ruvB1D28M3S5 | GU062651 | T03TC051 | C3H/HeN | D28 | Skin  |
| ruvB1D28M3S8 | GU062652 | T03TC051 | C3H/HeN | D28 | Skin  |
